# Supplementary material
Source: Research Square preprint supplement (doi:10.21203/rs.3.rs-6526732/v1)
Supplement: Supplementary file 1 [file d717ff574d34cbd22e673c60.docx]

**Supplementary Material A: List of Interview Participants**

| **Organisation name** | **Number of participants** | **Role** |
| --- | --- | --- |
| **United Nations Organisations** | | |
| United Nations High Commissioner for Refugees (UNHCR) | 3 | Protection staff |
| Protection staff |
| Protection staff |
| United Nations Office for the Coordination of Humanitarian Affairs (UNOCHA) | 4 | Advisory staff |
| Humanitarian affairs staff |
| Office head |
| Office head |
| United Nations World Food Programme (UNWFP) | 1 | Office head |
| International Organisation for Migration (IOM) | 1 | Disaster preparedness staff |
| **Red Cross Society** | | |
| International Federation of Red Cross and Red Crescent Societies (IFRC) | 3 | Shelter and settlement staff |
| Program staff |
| Operations staff |
| Philippine Red Cross | 1 | Branch head |
| Philippine Shelter Cluster | 1 | Shelter and settlement staff |
| **Bilateral organisation / government agency** | | |
| United States Agency for International Development (USAID) | 1 | Liaison staff |
| Australian Department of Foreign Affairs and Trade (DFAT) | 2 | Liaison staff |
| Program staff |
| **Non-governmental organisations** | | |
| *International* | | |
| CARE | 1 | Emergency response staff |
| Adventist Development and Relief Agency (ADRA) | 3 | Program staff |
| Disaster risk reduction staff |
| Emergency response staff |
| Habitat for Humanity International | 1 | Technical staff |
| *Local* | | |
| Philippine Disaster Resilience Foundation (PDRF) | 2 | Operations staff |
| Executive staff |
| Ecosystems Work For Essential Benefits (ECOWEB) | 1 | Executive staff |
| Leyte Centre for Development (LCDE) | 1 | Executive staff |
| Pakigdait Incorporation (PI) | 1 | Executive staff |
| Kutawato Greenland Initiatives (KGI) | 1 | Executive staff |
| **National government** | | |
| Disaster Response Management Bureau (DRMB), Department of Social Welfare and Development (DSWD) | 2 | Social welfare staff |
| Social welfare staff |
| **Local university** | | |
| Mindanao State University (MSU) | 2 | Academic staff |
| Faculty staff |

**Supplementary Material B: Interview Guide**

# Introductory Questions

1. Could you explain your role, and how you came to work in [organisation’s name]?
   - How many years have you worked in [organisation’s name / displacement context]?

# Perspectives on displacement trends

1. How have you observed displacement situations changing over the last 10 years? Are there any trends that stand out?
2. Over time, have the effects of climate change created displacement contexts of greater complexity?
3. In your experience, is it difficult to attribute movements of people to specific triggers?

# Defining Displacement Contexts

| **Interview question** | **Research question** |
| --- | --- |
| How does your organisation define/characterise various forms of displacement? | RQ1 |
| Does your organisation categorise or label displacement based on associated triggers such as “climate displacement” or “conflict displacement”? | RQ1 |
| Does the <classification mentioned by interviewee> apply to both climate-induced and conflict-induced displacement context?  E.g., Does the *classification by population size* apply to both climate-induced and conflict-induced displacement context? | RQ1 |
| Are there other characteristics of movements employed by your organisation in categorising or labelling displacement?  Only provide examples if participant requests clarification:   - Duration of displacement - Displaced population size - Race/ethnicity - Geographical location - Needs of displaced community | RQ1 |
| (Briefly state definitions of displacement drivers and triggers)  How does your organisation contextualise displacement drivers and triggers?  Does the difference between displacement drivers and triggers influence the way your organisation label or understand displacement contexts?  Does the difference between displacement drivers and triggers influence the way your organisation design responses? | RQ1 |

# Understanding humanitarian response

| **Interview question** | **Research question** |
| --- | --- |
| What factors does your organisation consider when determining which displacement crises to respond to? | RQ2 |
| If it is within your organisation’s mandate to respond to every displacement crisis, what is the extent of your organisation’s response to <each displacement crisis>? | RQ2 |
| Resources and funding within the humanitarian sector are scarce, how does your organisation balance allocating resources to different displacement crises? | RQ2 |
| Can you give an example of when your organisation was NOT able to respond to a displacement crisis? | RQ2 |
| Are there additional external factors that influence your organisation’s decision-making process on which displacement crises to respond to?  Only provide examples if participant requests clarification:   - Timespan – Short vs protracted - Characteristic of hazard event (if it is climate-related) – Rapid-onset vs slow-onset - Funding/Resource – Donors, funding, government assistance, resources available etc. - Associated trigger – Conflict-driven vs Climate-driven | RQ2 |
| What factors does your organisation consider when designing responses to address displacement crises? | Additional exploratory prompts |
| Are there additional external factors that influence the design of responses when addressing displacement crises?  Only provide examples if participant requests clarification:   - Timespan – Short vs protracted - Characteristic of hazard event (if it is climate-related) – Rapid-onset vs slow-onset - Funding/Resource – Donors, funding, government assistance, resources available etc. - Associated trigger – Conflict-driven vs Climate-driven | Additional exploratory prompts |
| If <insert issue mentioned by interviewee> is an issue in providing humanitarian aid, what did your organisation do about it?  E.g., If *accessibility* is an issue in providing humanitarian aid, what did your organisation do about it? *What did you do to gain access to communities etc.?* | Additional exploratory prompts |
| Can you walk me through what was different to how you respond to <a specific displacement crisis> versus a typical situation without <insert issue mentioned by interviewee>?  E.g., Can you walk me through what was different to how you respond to *communities displaced by disasters who were previously displaced by conflict* versus a typical *disaster-induced displacement situation without any ongoing conflict in the background*? | Additional exploratory prompts |
| How is your organisation dealing with increasingly protracted cases? | Additional exploratory prompts |
| At what point, or through what criteria does your organisation determine when to cease providing response or aid to displaced communities? | Additional exploratory prompts |

**Supplementary Material C: Coding Dictionary**

| **Coding themes** | **Coding description** |
| --- | --- |
| **1. Complex displacement** | **Past events mentioned by participants involving both climate-related and conflict-induced displacement** |
| **2. Defining displacement contexts** | **Labels and characteristics used by participants when discussing displacement contexts** |
| 2.1 By triggering event | Defined by the event causing displacement (e.g., disaster, conflict) |
| 2.2 By duration of displacement | Classified based on length of displacement |
| 2.3 By evacuation centres | Based on whether IDPs are residing in centralised formal shelters |
| 2.4 By geographic region | Defined by administrative boundary (e.g., Region I, Region II) |
| 2.5 By needs | Categorised according to type or severity of needs |
| 2.6 By past experiences | Framed through previous similar displacement events |
| 2.7 By preparedness interventions | Based on prior preparedness activities in the area |
| **3. Factors influencing decision to respond** | **Factors mentioned by participants when deciding on which displacement crisis to respond to** |
| 3.1 Depending on gaps | Driven by unmet post-emergency needs or aid gaps |
| 3.2 Depending on government | Triggered by government request for assistance |
| 3.3 Depending on local partner | Influence by presence of local implementing partners |
| 3.4 Depending on mandate areas | Based on pre-defined mandated geographic areas |
| 3.5 Depending on operational presence | Influence by existing presence in the affected area |
| 3.6 Depending on organisation's capacity | Dependent on available resources, staff, and logistics |
| 3.7 Depending on scale and severity | Dependent on crisis magnitude and urgency |
| 3.8 Depending on trigger events | Dependent on preceding disaster or conflict event |
| 3.9 Mandate/policy | Guided by organisational mandate or internal policy |
| 3.10 Security risk | Influence by safety risks or access limitations |

| **4. Displacement trends** | **When participants discuss how displacement trends have evolved based on their experiences** |
| --- | --- |
| 4.1 Climate-induced | Displacement linked to disasters or climate-related events |
| 4.2 Conflict-induced | Displacement resulting from armed conflict or violence |
| 4.3 Climate vs conflict | Comparison between climate- and conflict-induced displacement |
| 4.4 Development displacement | Displacement caused by development or infrastructure projects |
| 4.5 Evacuation centres | Trends in IDP movement within and outside evacuation facilities |
| 4.6 Protracted displacement | Long-term displacement situations |
| 4.7 Sporadic displacement | Recurring displacement events |
| 4.8 Getting worse | Perceived increase in frequency or severity of displacement |
| 4.9 Seasonal/timing | Displacement patterns linked to seasonal or cyclical timing |
| **5 Humanitarian response trends** | **When participants discuss how humanitarian response have evolved over time** |
| 5.1 Bureaucracy | Administrative delays impacting timely response efforts |
| 5.2 DRR-focussed | Emphasis on disaster risk reduction in response planning |
| 5.3 Generally improving | Perceived progress in humanitarian response system |
| 5.4 Inefficiency | Descriptions of poor coordination within or among organisations |
| 5.5 Media attention | Influence of media coverage on response priorities |
| 5.6 Political motivations | Political factors shaping selection of beneficiaries |
| 5.7 Pre-planned approaches | Overreliance on pre-defined plans or templates for response |
| 5.8 Saturated | Overserved areas with concentrated humanitarian presence |
| 5.9 Short-term | Emphasis on immediate relief over long-term recovery efforts |
| **6. Past examples of overlap responses** | **Examples shared by participants of humanitarian response to overlapping climate-induced and conflict-induced displacement** |
